# Supplementary material for: Induction of autophagy and autophagy‐dependent apoptosis in diffuse large B‐cell lymphoma by a new antimalarial artemisinin derivative, SM1044
Source: PubMed Central journal article supplement (PMC5806110; doi:10.1002/cam4.1276), 2017-12-26

# **Induction of autophagy and autophagy-dependent apoptosis in Diffuse large B-cell lymphoma by a new anti-malarial artemisinin derivative, SM1044**

## **Additional Files**

**Supplementary Figure 1** Inhibitory effect of SM1044 on SU-DHL-4 cells. **(A)** SU-DHL-4 cells were treated with the indicated concentrations of SM1044 for 24 h. The proportions of cells at each phase of the cell cycle were determined by flow cytometry (mean  $\pm$  S.E.M, n=3). **(B)** SU-DHL-4 cells were treated with the indicated concentrations of SM1044 for 24 h. Mitochondrial membrane potential (MMP) was measured by flow cytometry (mean  $\pm$  S.E.M, n=3). \*\* p<0.01, \*\*\* p<0.001.

**Supplementary Figure 2** Autophagy is induced prior to apoptosis by SM1044. SU-DHL-4 cells were treated with the indicated concentrations of SM1044 for 6 h or 24 h, respectively. Representative electron microscopy photomicrographs are shown. The green triangles indicate autophagosome, the yellow triangles indicate autolysosome and the red arrows point to the apoptosis bodies.

**Supplementary Figure 3** Autophagy inhibitors reverse the inhibitory effect of SM1044 in SU-DHL-4 cells. SU-DHL-4 cells were pre-treated with CQ or Baf A1 for 1 h, followed by SM1044 treatment for another 24 h. Cell viability was measured by CCK-8 (mean  $\pm$  S.E.M, n=3). \*\*\* p<0.001.

**Supplementary Figure 4** No significant changes were observed in the activity of LKB1 or ATP level after the addition of SM1044. SU-DHL-4 cells were treated with SM1044 for the indicated time courses. The expression of p-LKB1 was detected by

western blot (**A**) and the level of ATP was detected by an enhanced ATP assay kit (mean  $\pm$  S.E.M, n=3) (**B**). NS, no significance.

## Supplementary Figure 1

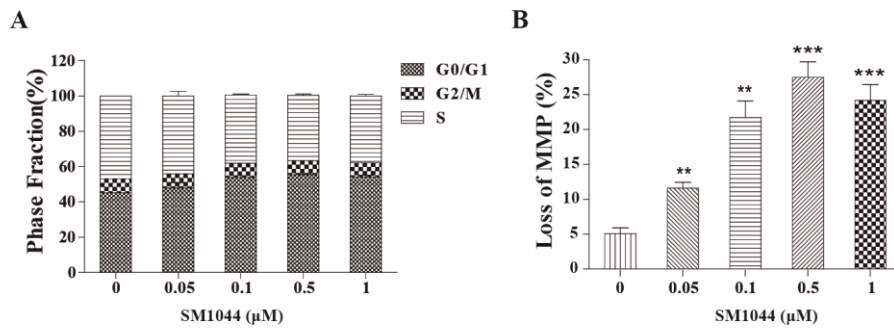

## Supplementary Figure 2

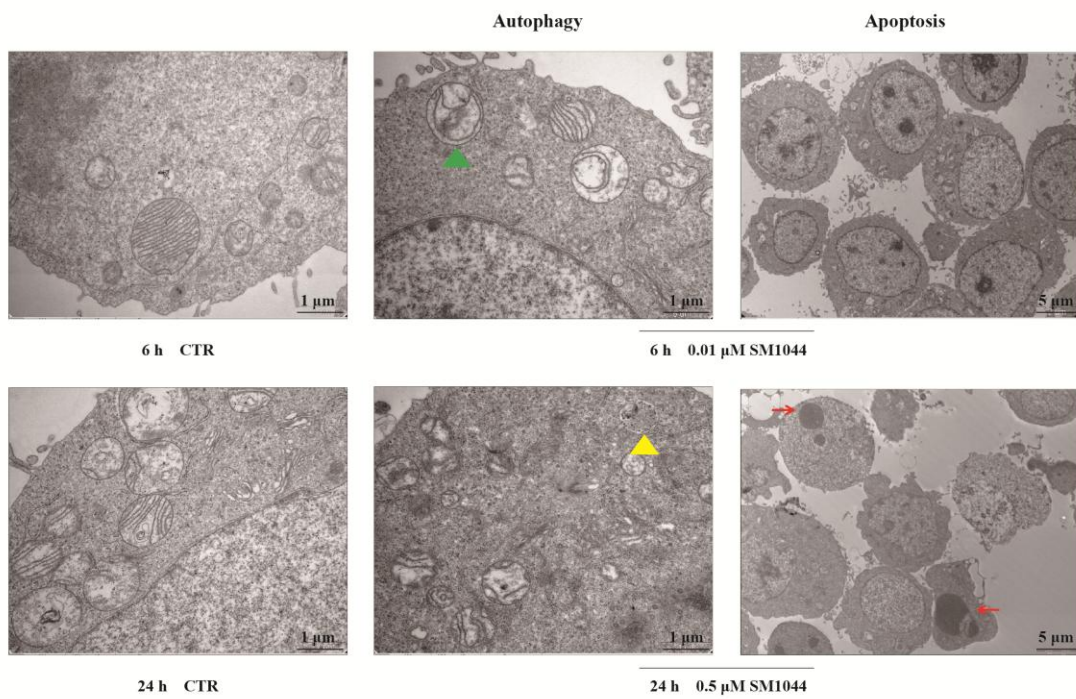

### Supplementary Figure 3

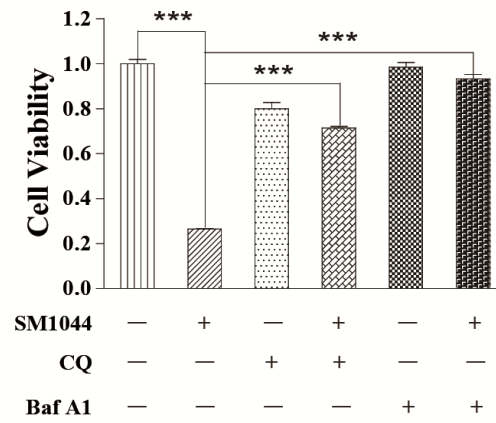

### Supplementary Figure 4

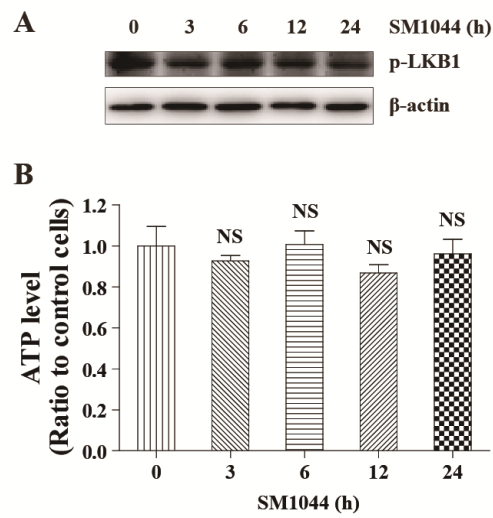

Supplement: CAM4-7-380-s001.pdf [file CAM4-7-380-s001.pdf]
